# Supplementary material
Source: Elsevier journal article supplement (https://www.sciencedirect.com/science/article/pii/S2238785419304284)
Supplement: mmc1 [file S2238785419304284:mmc1.docx]

**Supplementary Data**

**Synthesis and characterization of MgO supported Fe-Co-Mn nanoparticles with exceptionally high adsorption capacity for Rhodamine B dye**

Somayeh Rahdar1, Abbas Rahdar2*, Muhammad Nadeem Zafar3*, Syed Salman Shafqat4

1Department of Environmental Health, Zabol University of Medical Sciences, Zabol, Iran

2Department of Physics, University of Zabol, Zabol, P. O. Box 98613-35856, Iran

3Department of Chemistry, University of Gujrat, Gujrat, 50700 Pakistan

4Department of Chemistry, University of Education, Lahore, 54770 Pakistan


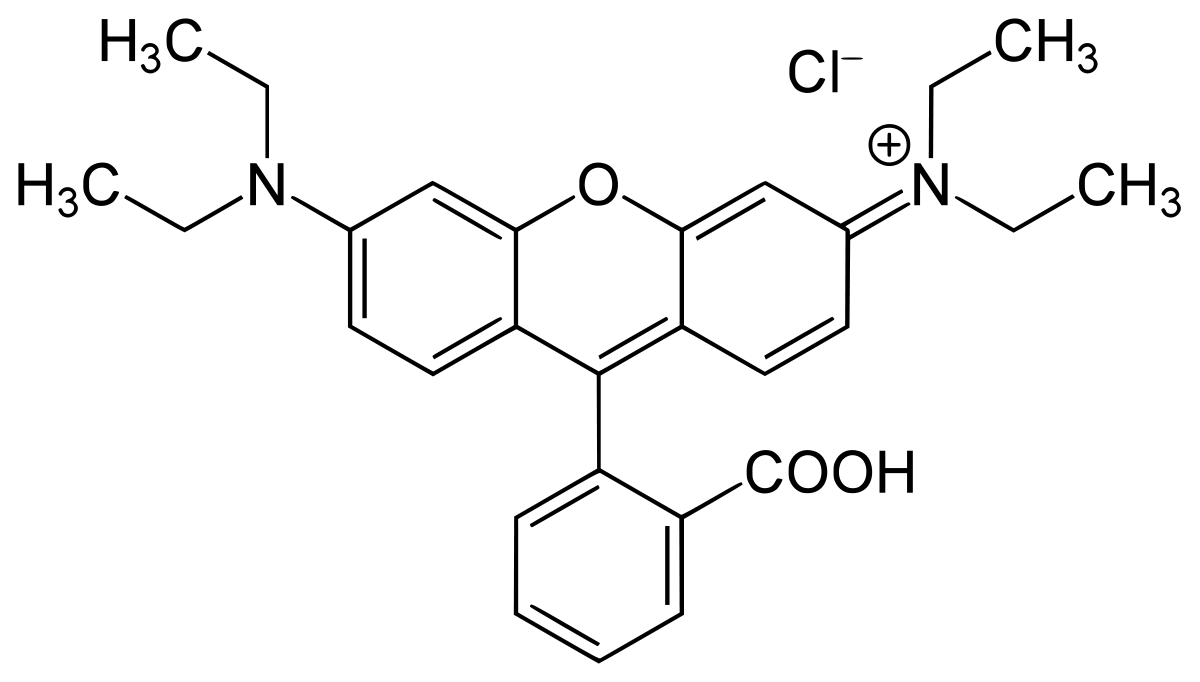


**Fig. S1 - Structure of Rhodamine B (RhB)**

**Fig. S2 - BET isotherm of MgO-FCM-NPs**

**Fig. S3 - Regeneration of MgO-FCM-NPs for RhB by 5% acetic acid/ethanol (v/v)**
